# Supplementary material
Source: PubMed Central journal article supplement (PMC4379141)
Supplement: NIHMS632245-supplement-10439_2014_1137_MOESM4_ESM.pdf [file NIHMS632245-supplement-10439_2014_1137_MOESM4_ESM.pdf]

**S-Table I.**  
**Cell Shape**

| <b>Tendon</b> | <b>Group</b> | <b>Region</b> | <b>2 weeks<br/>(mm/mm)</b> | <b>4 weeks<br/>(mm/mm)</b> | <b>8 weeks<br/>(mm/mm)</b> |
|---------------|--------------|---------------|----------------------------|----------------------------|----------------------------|
| Biceps        | SD           | INS           | 0.754 ± 0.09               | 0.685 ± 0.08               | 0.623 ± 0.05               |
|               | OV           |               | 0.752 ± 0.06               | 0.720 ± 0.05               | 0.658 ± 0.06               |
|               | SD + OV      |               | 0.739 ± 0.07               | 0.689 ± 0.10               | 0.671 ± 0.07               |
|               | SD           | INTRA         | 0.689 ± 0.04               | 0.689 ± 0.08               | 0.598 ± 0.10               |
|               | OV           |               | 0.718 ± 0.06               | 0.612 ± 0.05               | 0.601 ± 0.08               |
|               | SD + OV      |               | 0.698 ± 0.06               | 0.663 ± 0.05               | 0.631 ± 0.04               |
|               | SD           | PROX          | 0.598 ± 0.04               | 0.645 ± 0.08               | 0.609 ± 0.11               |
|               | OV           |               | 0.638 ± 0.07               | 0.582 ± 0.06               | 0.530 ± 0.08               |
|               | SD + OV      |               | 0.661 ± 0.05               | 0.558 ± 0.05               | 0.490 ± 0.03               |
|               | SD           | DIS           | 0.494 ± 0.06               | 0.577 ± 0.04               | 0.556 ± 0.14               |
|               | OV           |               | 0.488 ± 0.14               | 0.520 ± 0.09               | 0.475 ± 0.13               |
|               | SD + OV      |               | 0.519 ± 0.14               | 0.336 ± 0.03***            | 0.410 ± 0.16               |
| Supra         | SD           | INS           | 0.695 ± 0.04               | 0.646 ± 0.09               | 0.650 ± 0.03               |
|               | OV           |               | 0.715 ± 0.03               | 0.702 ± 0.10               | 0.596 ± 0.08               |
|               | SD + OV      |               | 0.682 ± 0.02               | 0.697 ± 0.08               | 0.640 ± 0.06               |
|               | SD           | MID           | 0.662 ± 0.03               | 0.502 ± 0.06               | 0.402 ± 0.07               |
|               | OV           |               | 0.621 ± 0.03               | 0.487 ± 0.06               | 0.538 ± 0.04               |
|               | SD + OV      |               | 0.576 ± 0.06               | 0.529 ± 0.11               | 0.579 ± 0.05*              |

**S-Table I.** At 4 weeks, cell shape was significantly less rounded at the biceps distal groove (DIS) in the SD + OV group compared to SD and OV. At 8 weeks, cell shape was significantly more rounded at the supraspinatus mid-substance (MID) in the SD + OV group compared to SD. Data is shown as mean ± standard deviation (p<0.025 (SD vs. SD + OV\*, OV vs. SD + OV\*\*)). (SD=scapular dyskinesis, OV=overuse)

**S-Table II.**  
**Cell Density**

| <b>Tendon</b> | <b>Group</b> | <b>Region</b> | <b>2 weeks<br/>(cells/mm<sup>2</sup>)</b> | <b>4 weeks<br/>(cells/mm<sup>2</sup>)</b> | <b>8 weeks<br/>(cells/mm<sup>2</sup>)</b> |
|---------------|--------------|---------------|-------------------------------------------|-------------------------------------------|-------------------------------------------|
| Biceps        | SD           | INS           | 300 ± 53                                  | 184 ± 94                                  | 276 ± 52                                  |
|               | OV           |               | 252 ± 37                                  | 363 ± 119                                 | 437 ± 126                                 |
|               | SD + OV      |               | 272 ± 46                                  | 262 ± 50                                  | 463 ± 305                                 |
|               | SD           | INTRA         | 331 ± 108                                 | 328 ± 64                                  | 255 ± 27                                  |
|               | OV           |               | 309 ± 110                                 | 396 ± 114                                 | 322 ± 104                                 |
|               | SD + OV      |               | 364 ± 89                                  | 327 ± 123                                 | 306 ± 104                                 |
|               | SD           | PROX          | 426 ± 181                                 | 295 ± 65                                  | 321 ± 130                                 |
|               | OV           |               | 336 ± 99                                  | 331 ± 118                                 | 352 ± 24                                  |
|               | SD + OV      |               | 272 ± 42                                  | 440 ± 220                                 | 434 ± 126                                 |
|               | SD           | DIS           | 351 ± 199                                 | 327 ± 89                                  | 334 ± 152                                 |
|               | OV           |               | 327 ± 133                                 | 474 ± 90                                  | 338 ± 131                                 |
|               | SD + OV      |               | 402 ± 119                                 | 335 ± 42                                  | 358 ± 41                                  |
| Supra         | SD           | INS           | 448 ± 306                                 | 387 ± 59                                  | 461 ± 87                                  |
|               | OV           |               | 433 ± 260                                 | 308 ± 52                                  | 230 ± 83                                  |
|               | SD + OV      |               | 597 ± 278                                 | 299 ± 74                                  | 419 ± 75**                                |
|               | SD           | MID           | 282 ± 121                                 | 431 ± 113                                 | 594 ± 23                                  |
|               | OV           |               | 393 ± 151                                 | 444 ± 181                                 | 428 ± 105                                 |
|               | SD + OV      |               | 450 ± 81                                  | 388 ± 81                                  | 806 ± 665                                 |

**S-Table II.** At 8 weeks, cell density was significantly increased at the supraspinatus insertion (INS) in the SD + OV group compared OV. ( $p < 0.025$  (OV vs. SD + OV\*\*)) (SD=scapular dyskinesis, OV=overuse)
